# Supplementary material for: Transcriptome Sequencing and Characterization for the Sea Cucumber Apostichopus japonicus (Selenka, 1867)
Source: PLoS One. 2012 Mar 12;7(3):e33311. doi: 10.1371/journal.pone.0033311 (PMC3299772; doi:10.1371/journal.pone.0033311)
Supplement: Table S3 — Differential expressed genes identified by transcriptome comparison between the active and aestivating sea cucumbers. (XLS) [file pone.0033311.s005.xls]

## Sheet: Down-regulated genes
Sequence ID	Gene Name (top BLAST hit)	Number of reads in active adults libarary	Relative abundance in active adults libarary	Number of reads in aestivating adults libarary	Relative abundance in aestivating adults libarary	Fold change	P-value (Audic and Claverie test)	FDR
isogroup15831	N/A	125	0.00073176	0	0	0	0	0
isogroup17801	N/A	118	0.000690782	0	0	0	0	0
isogroup06809	Aqualysin-1	63	0.000368807	0	0	0	0	0
isogroup14634	N/A	52	0.000304412	0	0	0	0	0
isogroup05448	Carboxypeptidase A1	41	0.000240017	0	0	0	0	0
isogroup12057	Carboxypeptidase B	35	0.000204893	0	0	0	0	0
isogroup18035	N/A	32	0.000187331	0	0	0	0	0
isogroup02834	N/A	31	0.000181477	0	0	0	0	0
isogroup04933	Pre-mRNA cleavage complex 2 protein Pcf11	29	0.000169768	0	0	0	0	0
isogroup02626	Aqualysin-1	26	0.000152206	0	0	0	0	0
isogroup03436	N/A	25	0.000146352	0	0	0	0	0
isogroup06690	N/A	24	0.000140498	0	0	0	0	0
isogroup20842	N/A	24	0.000140498	0	0	0	0	0
isogroup04262	N/A	23	0.000134644	0	0	0	0	0
isogroup08005	N/A	23	0.000134644	0	0	0	0	0
isogroup17652	Heat shock protein 90-1	22	0.00012879	0	0	0	0	0
isogroup06406	N/A	22	0.00012879	0	0	0	0	0
isogroup07953	N/A	22	0.00012879	0	0	0	0	0
isogroup08776	Fibrinogen-like protein A	21	0.000122936	0	0	0	1e-06	0.000441044
isogroup07871	N/A	20	0.000117082	0	0	0	1e-06	0.000441044
isogroup13152	N/A	20	0.000117082	0	0	0	1e-06	0.000441044
isogroup18581	N/A	20	0.000117082	0	0	0	1e-06	0.000441044
isogroup02541	Aqualysin-1	1406	0.00823084	4	2.54e-05	0.00308775	0	0
isogroup06733	Aqualysin-1	2559	0.0149806	12	7.62e-05	0.00508953	0	0
isogroup00620	Aqualysin-1	2659	0.015566	16	0.000102	0.00653083	0	0
isogroup01873	N/A	219	0.00128204	2	1.27e-05	0.0099118	0	0
isogroup06168	Pancreatic triacylglycerol lipase	59	0.000345391	1	6.35e-06	0.0183956	0	0
isogroup04222	N/A	115	0.000673219	2	1.27e-05	0.0188755	0	0
isogroup00121	LIM domain and actin-binding protein 1	146	0.000854696	3	1.91e-05	0.0223016	0	0
isogroup01557	Aqualysin-1	192	0.00112398	4	2.54e-05	0.0226113	0	0
isogroup02797	Protein AIG1	74	0.000433202	2	1.27e-05	0.0293336	0	0
isogroup14170	N/A	30	0.000175622	1	6.35e-06	0.0361781	0	0
isogroup03009	N/A	28	0.000163914	1	6.35e-06	0.0387622	0	0
isogroup07625	N/A	28	0.000163914	1	6.35e-06	0.0387622	0	0
isogroup01468	Zinc finger CCCH-type with G patch domain-containing protein	26	0.000152206	1	6.35e-06	0.0417439	0	0
isogroup02796	N/A	25	0.000146352	1	6.35e-06	0.0434137	1e-06	0.000441044
isogroup16824	N/A	25	0.000146352	1	6.35e-06	0.0434137	1e-06	0.000441044
isogroup17081	N/A	25	0.000146352	1	6.35e-06	0.0434137	1e-06	0.000441044
isogroup09968	N/A	24	0.000140498	1	6.35e-06	0.0452226	1e-06	0.000441044
isogroup03922	N/A	22	0.00012879	1	6.35e-06	0.0493338	3e-06	0.00121138
isogroup17908	Heat shock protein 81-1	21	0.000122936	1	6.35e-06	0.051683	6e-06	0.00216005
isogroup02427	N/A	20	0.000117082	1	6.35e-06	0.0542671	1.1e-05	0.0035727
isogroup13484	N/A	20	0.000117082	1	6.35e-06	0.0542671	1.1e-05	0.0035727
isogroup04735	N/A	164	6.3537e-05	10	6.35e-05	0.0661794	0	0
isogroup09891	N/A	31	0.000181477	2	1.27e-05	0.0700221	0	0
isogroup00715	Fibrinogen-like protein A	29	0.000169768	2	1.27e-05	0.0748512	0	0
isogroup00194	E3 ubiquitin-protein ligase MYLIP-A	215	0.00125863	15	9.53e-05	0.0757216	0	0
isogroup01632	Beta-centractin	28	0.000163914	2	1.27e-05	0.0775245	1e-06	0.000441044
isogroup05704	N/A	27	0.00015806	2	1.27e-05	0.0803958	1e-06	0.000441044
isogroup06879	Heat shock protein 90	143	0.000837134	11	6.99e-05	0.0834879	0	0
isogroup04871	Protein FRA10AC1 homolog	39	0.000228309	3	1.91e-05	0.0834879	0	0
isogroup03355	P protein	26	0.000152206	2	1.27e-05	0.0834879	2e-06	0.000832913
isogroup05027	N/A	36	0.000210747	3	1.91e-05	0.0904452	0	0
isogroup05241	N/A	24	0.000140498	2	1.27e-05	0.0904452	6e-06	0.00216005
isogroup01210	Fibrinogen-like protein A	46	0.000269288	4	2.54e-05	0.0943776	0	0
isogroup10434	WW domain-containing oxidoreductase	23	0.000134644	2	1.27e-05	0.0943776	1.1e-05	0.0035727
isogroup02557	Leucine-rich repeat-containing protein 68	146	0.000854696	13	8.26e-05	0.0966401	0	0
isogroup08124	Dystonin	33	0.000193185	3	1.91e-05	0.0986675	0	0
isogroup02659	N/A	22	0.00012879	2	1.27e-05	0.0986675	1.9e-05	0.00556602
isogroup04781	Interferon-induced very large GTPase 1	43	0.000251725	4	2.54e-05	0.100962	0	0
isogroup00091	N/A	32	0.000187331	3	1.91e-05	0.101751	0	0
isogroup02437	N/A	42	0.000245871	4	2.54e-05	0.103366	0	0
isogroup02687	N/A	42	0.000245871	4	2.54e-05	0.103366	0	0
isogroup05593	N/A	21	0.000122936	2	1.27e-05	0.103366	3.4e-05	0.00929927
isogroup06401	N/A	21	0.000122936	2	1.27e-05	0.103366	3.4e-05	0.00929927
isogroup05946	N/A	31	0.000181477	3	1.91e-05	0.105033	1e-06	0.000441044
isogroup08359	N/A	31	0.000181477	3	1.91e-05	0.105033	1e-06	0.000441044
isogroup01130	Phosphatidylinositol-5-phosphate 4-kinase type-2 beta	61	0.000357099	6	3.81e-05	0.106755	0	0
isogroup08586	Fibrinogen-like protein A	20	0.000117082	2	1.27e-05	0.108534	5.9e-05	0.0141604
isogroup08342	N/A	20	0.000117082	2	1.27e-05	0.108534	5.9e-05	0.0141604
isogroup08553	N/A	20	0.000117082	2	1.27e-05	0.108534	5.9e-05	0.0141604
isogroup10283	N/A	20	0.000117082	2	1.27e-05	0.108534	5.9e-05	0.0141604
isogroup00237	Nuclear factor related to kappa-B-binding protein	49	0.00028685	5	3.18e-05	0.110749	0	0
isogroup06405	N/A	38	0.000222455	4	2.54e-05	0.114247	0	0
isogroup02286	Cathepsin B	70	0.000409786	8	5.08e-05	0.124039	0	0
isogroup06153	Proteoglycan 4	26	0.000152206	3	1.91e-05	0.125232	9e-06	0.0029964
isogroup02145	N/A	43	0.000251725	5	3.18e-05	0.126203	0	0
isogroup05335	N/A	42	0.000245871	5	3.18e-05	0.129207	0	0
isogroup04530	Calponin homology domain-containing protein DDB_G0272472	58	0.000339537	7	4.45e-05	0.13099	0	0
isogroup01125	RNA-binding protein Nova-2	41	0.000240017	5	3.18e-05	0.132359	0	0
isogroup01276	N/A	72	0.000421494	9	5.72e-05	0.135668	0	0
isogroup00240	Protein Daple	32	0.000187331	4	2.54e-05	0.135668	1e-06	0.000441044
isogroup00456	N/A	32	0.000187331	4	2.54e-05	0.135668	1e-06	0.000441044
isogroup04541	Mannosyl-oligosaccharide 1,2-alpha-mannosidase IB	55	0.000321974	7	4.45e-05	0.138135	0	0
isogroup02112	Protein sidekick-2	355	0.0020782	46	0.000292	0.140636	0	0
isogroup02183	1,25-dihydroxyvitamin D(3) 24-hydroxylase, mitochondrial	23	0.000134644	3	1.91e-05	0.141566	4.5e-05	0.0115419
isogroup01095	N/A	61	0.000357099	8	5.08e-05	0.14234	0	0
isogroup00822	N/A	91	0.000532721	12	7.62e-05	0.143122	0	0
isogroup02160	Protein KRI1 homolog	30	0.000175622	4	2.54e-05	0.144712	4e-06	0.00151775
isogroup01195	Down syndrome cell adhesion molecule-like protein 1	22	0.00012879	3	1.91e-05	0.148001	7.6e-05	0.0174304
isogroup00419	DDB1- and CUL4-associated factor 8	29	0.000169768	4	2.54e-05	0.149702	7e-06	0.0024975
isogroup10691	Fibrinogen-like protein A	50	0.000292704	7	4.45e-05	0.151948	0	0
isogroup00389	N/A	35	0.000204893	5	3.18e-05	0.155049	1e-06	0.000441044
isogroup09586	N/A	28	0.000163914	4	2.54e-05	0.155049	1.1e-05	0.0035727
isogroup05683	Poly(U)-specific endoribonuclease	34	0.000199039	5	3.18e-05	0.159609	2e-06	0.000832913
isogroup10262	N/A	27	0.00015806	4	2.54e-05	0.160792	1.9e-05	0.00556602
isogroup01360	N/A	20	0.000117082	3	1.91e-05	0.162801	0.000216	0.0404655
isogroup00773	Plexin-A4	92	0.000538575	14	8.9e-05	0.165161	0	0
isogroup02351	N/A	110	0.000643949	17	0.000108	0.167735	0	0
isogroup00635	Rho GTPase-activating protein 12	58	0.000339537	9	5.72e-05	0.168415	0	0
isogroup04946	Bromodomain adjacent to zinc finger domain protein 2B	45	0.000263434	7	4.45e-05	0.168831	0	0
isogroup04554	Symplekin	32	0.000187331	5	3.18e-05	0.169585	5e-06	0.00183881
isogroup08363	Splicing factor 3B subunit 1	32	0.000187331	5	3.18e-05	0.169585	5e-06	0.00183881
isogroup10052	40S ribosomal protein S2	38	0.000222455	6	3.81e-05	0.17137	1e-06	0.000441044
isogroup01169	Runt-related transcription factor 1	25	0.000146352	4	2.54e-05	0.173655	5.3e-05	0.0134781
isogroup02108	Sushi, von Willebrand factor type A, EGF and pentraxin domain-containing protein 1	174	0.00101861	28	0.000177903	0.174653	0	0
isogroup05179	N/A	31	0.000181477	5	3.18e-05	0.175055	8e-06	0.00275557
isogroup04521	N/A	111	0.000649803	18	0.000114	0.176002	0	0
isogroup01452	N/A	74	0.000433202	12	7.62e-05	0.176002	0	0
isogroup05384	N/A	37	0.000216601	6	3.81e-05	0.176002	1e-06	0.000441044
isogroup07112	N/A	37	0.000216601	6	3.81e-05	0.176002	1e-06	0.000441044
isogroup02682	Pericentriolar material 1 protein	30	0.000175622	5	3.18e-05	0.18089	1.3e-05	0.00416568
isogroup01099	N/A	35	0.000204893	6	3.81e-05	0.186059	3e-06	0.00121138
isogroup04546	Transcriptional-regulating factor 1	64	0.000374661	11	6.99e-05	0.186543	0	0
isogroup02234	N/A	29	0.000169768	5	3.18e-05	0.187128	2.2e-05	0.00627567
isogroup00415	N/A	28	0.000163914	5	3.18e-05	0.193811	3.6e-05	0.00971293
isogroup05165	Ribosome biogenesis protein BMS1 homolog	33	0.000193185	6	3.81e-05	0.197335	9e-06	0.0029964
isogroup04786	S-formylglutathione hydrolase	49	0.00028685	9	5.72e-05	0.199349	0	0
isogroup05809	N/A	76	0.00044491	14	8.9e-05	0.199932	0	0
isogroup06843	N/A	54	0.00031612	10	6.35e-05	0.200989	0	0
isogroup06757	N/A	27	0.00015806	5	3.18e-05	0.200989	5.8e-05	0.0141188
isogroup11905	N/A	27	0.00015806	5	3.18e-05	0.200989	5.8e-05	0.0141188
isogroup04523	N/A	435	0.00254653	81	0.000515	0.202098	0	0
isogroup00304	Fibrinogen-like protein A	32	0.000187331	6	3.81e-05	0.203502	1.5e-05	0.00470563
isogroup05521	N/A	42	0.000245871	8	5.08e-05	0.206732	1e-06	0.000441044
isogroup04876	N/A	78	0.000456618	15	9.53e-05	0.20872	0	0
isogroup05216	Fukutin	26	0.000152206	5	3.18e-05	0.20872	9.5e-05	0.0210662
isogroup00866	N/A	26	0.000152206	5	3.18e-05	0.20872	9.5e-05	0.0210662
isogroup03048	N/A	36	0.000210747	7	4.45e-05	0.211039	6e-06	0.00216005
isogroup00439	RalA-binding protein 1	46	0.000269288	9	5.72e-05	0.21235	0	0
isogroup00339	Scavenger receptor cysteine-rich type 1 protein M130	180	0.00105374	36	0.000229	0.217069	0	0
isogroup02141	Splicing factor U2af large subunit B	45	0.000263434	9	5.72e-05	0.217069	1e-06	0.000441044
isogroup04675	Nucleosome-remodeling factor subunit NURF301	45	0.000263434	9	5.72e-05	0.217069	1e-06	0.000441044
isogroup06316	WAP four-disulfide core domain protein 3	35	0.000204893	7	4.45e-05	0.217069	1e-05	0.0032836
isogroup14896	Probable ATP-dependent RNA helicase ddx42	25	0.000146352	5	3.18e-05	0.217069	0.000153	0.0314751
isogroup04605	N/A	25	0.000146352	5	3.18e-05	0.217069	0.000153	0.0314751
isogroup04874	N/A	25	0.000146352	5	3.18e-05	0.217069	0.000153	0.0314751
isogroup01730	AT-rich interactive domain-containing protein 5B	34	0.000199039	7	4.45e-05	0.223453	1.6e-05	0.00490351
isogroup05345	N/A	34	0.000199039	7	4.45e-05	0.223453	1.6e-05	0.00490351
isogroup06712	N/A	34	0.000199039	7	4.45e-05	0.223453	1.6e-05	0.00490351
isogroup08934	Eukaryotic translation initiation factor 4 gamma 2	58	0.000339537	12	7.62e-05	0.224554	0	0
isogroup08979	N/A	29	0.000169768	6	3.81e-05	0.224554	6.1e-05	0.0145237
isogroup00281	Apoptosis inhibitor 5	24	0.000140498	5	3.18e-05	0.226113	0.000245	0.045051
isogroup06392	N/A	24	0.000140498	5	3.18e-05	0.226113	0.000245	0.045051
isogroup07089	N/A	24	0.000140498	5	3.18e-05	0.226113	0.000245	0.045051
isogroup01408	Tetratricopeptide repeat protein 14	159	0.000930799	34	0.000216	0.232086	0	0
isogroup00179	N/A	28	0.000163914	6	3.81e-05	0.232573	9.7e-05	0.0214302
isogroup04993	Transcription initiation factor TFIID subunit 3	46	0.000269288	10	6.35e-05	0.235944	1e-06	0.000441044
isogroup01541	Na(+)/H(+) exchange regulatory cofactor NHE-RF2	32	0.000187331	7	4.45e-05	0.237419	3.9e-05	0.0101335
isogroup07320	Phosphofurin acidic cluster sorting protein 2	32	0.000187331	7	4.45e-05	0.237419	3.9e-05	0.0101335
isogroup12856	N/A	32	0.000187331	7	4.45e-05	0.237419	3.9e-05	0.0101335
isogroup00112	Carboxypeptidase A5	45	0.000263434	10	6.35e-05	0.241187	2e-06	0.000832913
isogroup04962	Sortilin-related receptor	36	0.000210747	8	5.08e-05	0.241187	1.6e-05	0.00490351
isogroup09917	E3 ubiquitin-protein ligase TRIM56	27	0.00015806	6	3.81e-05	0.241187	0.000154	0.0316264
isogroup04522	Transcriptional regulator ATRX	71	0.00041564	16	0.000102	0.244584	0	0
isogroup00153	Probable RNA polymerase II nuclear localization protein SLC7A6OS	93	0.00054443	21	0.000133427	0.245077	0	0
isogroup05923	N/A	31	0.000181477	7	4.45e-05	0.245077	6.2e-05	0.0147325
isogroup05327	N/A	84	0.000491743	19	0.00012072	0.245494	0	0
isogroup08423	Golgi apparatus protein 1	56	0.000327829	13	8.26e-05	0.251955	0	0
isogroup02110	Putative uncharacterized protein ART2	2287	0.0133883	540	0.00343099	0.256268	0	0
isogroup04745	Pericentrin	38	0.000222455	9	5.72e-05	0.257055	1.6e-05	0.00490351
isogroup00020	N/A	401	0.00234749	96	0.00061	0.259833	0	0
isogroup00690	S phase cyclin A-associated protein in the endoplasmic reticulum	33	0.000193185	8	5.08e-05	0.263113	6.1e-05	0.0145237
isogroup08187	N/A	41	0.000240017	10	6.35e-05	0.264718	1e-05	0.0032836
isogroup00950	Short-chain collagen C4	126	0.000737614	31	0.000196964	0.267029	0	0
isogroup09292	N/A	32	0.000187331	8	5.08e-05	0.271336	9.4e-05	0.0209221
isogroup05560	N/A	63	0.000368807	16	0.000101659	0.275643	0	0
isogroup03134	N/A	35	0.000204893	9	5.72e-05	0.279088	5.9e-05	0.0141604
isogroup00325	Protein mago nashi homolog	69	0.000403932	18	0.000114	0.283133	0	0
isogroup05267	Eukaryotic initiation factor 4A-II	84	0.000491743	22	0.000139781	0.284256	0	0
isogroup00977	Matrix metalloproteinase-14	57	0.000333683	15	9.53e-05	0.285616	1e-06	0.000441044
isogroup00943	Metalloproteinase inhibitor 1	148	0.000866404	39	0.000247794	0.286002	0	0
isogroup08600	Signal recognition particle receptor subunit alpha	83	0.000485889	22	0.00014	0.287681	0	0
isogroup00934	N/A	1569	0.00918505	418	0.00266	0.289148	0	0
isogroup04393	N/A	30	0.000175622	8	5.08e-05	0.289425	0.000221	0.0410745
isogroup00051	Pre-mRNA-splicing factor CWC22 homolog	52	0.000304412	14	8.9e-05	0.292208	2e-06	0.000832913
isogroup04736	N/A	165	0.000965923	45	0.000285916	0.296003	0	0
isogroup01866	60S ribosomal protein L8	51	0.000298558	14	8.9e-05	0.297937	4e-06	0.00151775
isogroup04616	Diacylglycerol kinase beta	65	0.000380515	18	0.000114366	0.300556	0	0
isogroup09112	Ubiquitin-like protein 7	43	0.000251725	12	7.62e-05	0.302886	2.2e-05	0.00627567
isogroup04544	IQ motif and SEC7 domain-containing protein 1	78	0.000456618	22	0.000139781	0.306122	0	0
isogroup00552	N/A	78	0.000456618	22	0.000139781	0.306122	0	0
isogroup02634	N/A	109	0.000638095	31	0.000196964	0.308675	0	0
isogroup00797	N/A	371	0.00217186	106	0.000673	0.310098	0	0
isogroup05920	Eukaryotic translation initiation factor 4 gamma 1	56	0.000327829	16	0.000102	0.310098	2e-06	0.000832913
isogroup00099	F-box/WD repeat-containing protein 1A	38	0.000222455	11	6.99e-05	0.314178	7.8e-05	0.0176234
isogroup10533	40S ribosomal protein S6	34	0.000199039	10	6.35e-05	0.319218	0.000189	0.0368513
isogroup00156	N/A	183	0.0010713	54	0.000343	0.320265	0	0
isogroup00647	Bifunctional protein NCOAT	57	0.000333683	17	0.000108013	0.323699	3e-06	0.00121138
isogroup01357	N/A	50	0.000292704	15	9.53e-05	0.325603	1.2e-05	0.00386597
isogroup13967	N/A	59	0.000345391	18	0.000114	0.331121	3e-06	0.00121138
isogroup04679	Bromodomain-containing protein 4	36	0.000210747	11	6.99e-05	0.331632	0.000172	0.0341494
isogroup04724	Chromodomain-helicase-DNA-binding protein 7	36	0.000210747	11	6.99e-05	0.331632	0.000172	0.0341494
isogroup02151	Tyrosine-protein kinase receptor Tie-1	101	0.000591262	31	0.000196964	0.333125	0	0
isogroup10025	40S ribosomal protein S3	58	0.000339537	18	0.000114366	0.33683	4e-06	0.00151775
isogroup02196	Probable ATP-dependent RNA helicase DDX6	74	0.000433202	23	0.000146	0.337336	0	0
isogroup04649	Structural maintenance of chromosomes protein 3	67	0.000392223	21	0.000133	0.340182	1e-06	0.000441044
isogroup07821	Short-chain collagen C4	47	0.000275142	15	9.53e-05	0.346386	3.7e-05	0.00971945
isogroup04957	N/A	47	0.000275142	15	9.53e-05	0.346386	3.7e-05	0.00971945
isogroup06517	Techylectin-5B	46	0.000269288	15	9.53e-05	0.353916	5.4e-05	0.0135879
isogroup01361	N/A	52	0.000304412	17	0.000108013	0.354824	2.1e-05	0.00603361
isogroup07124	Heterogeneous nuclear ribonucleoprotein U-like protein 1	228	0.00133473	77	0.000489234	0.366541	0	0
isogroup04599	Follistatin-related protein 5	56	0.000327829	19	0.00012072	0.368241	1.7e-05	0.00517021
isogroup06104	Coiled-coil domain-containing protein 9	50	0.000292704	17	0.000108	0.369017	4.3e-05	0.0110527
isogroup02846	Hemicentin-1	47	0.000275142	16	0.000101659	0.369478	7e-05	0.0162774
isogroup01538	Nipped-B-like protein	44	0.00025758	15	9.53e-05	0.370003	0.000112	0.0239474
isogroup01691	1-phosphatidylinositol-4,5-bisphosphate phosphodiesterase epsilon-1	79	0.000462472	27	0.000171549	0.37094	1e-06	0.000441044
isogroup04762	Acidic leucine-rich nuclear phosphoprotein 32 family member A	67	0.000392223	23	0.000146135	0.37258	4e-06	0.00151775
isogroup00368	N/A	61	0.000357099	21	0.000133	0.373643	9e-06	0.0029964
isogroup05343	Small ubiquitin-related modifier 3	198	0.00115911	69	0.000438	0.378225	0	0
isogroup02125	General transcriptional corepressor trfA	43	0.000251725	15	9.53e-05	0.378608	0.000161	0.0323415
isogroup04542	Chromodomain-helicase-DNA-binding protein 2	43	0.000251725	15	9.53e-05	0.378608	0.000161	0.0323415
isogroup09573	40S ribosomal protein S4	63	0.000368807	22	0.000139781	0.379009	8e-06	0.00275557
isogroup02384	Phosphoglycerate kinase	40	0.000234163	14	8.9e-05	0.37987	0.00026	0.0476625
isogroup04716	Arf-GAP with coiled-coil, ANK repeat and PH domain-containing protein 2	75	0.000439056	27	0.000171549	0.390723	2e-06	0.000832913
isogroup01050	Putative uncharacterized oxidoreductase YDR541C	271	0.00158646	100	0.000635368	0.400495	0	0
isogroup06627	Dystonin	51	0.000298558	19	0.00012072	0.404343	9.8e-05	0.0216112
isogroup03020	Whey acidic protein	59	0.000345391	22	0.000139781	0.404704	3.4e-05	0.00929927
isogroup02768	N/A	59	0.000345391	22	0.000139781	0.404704	3.4e-05	0.00929927
isogroup01650	N/A	56	0.000327829	21	0.000133427	0.407004	5.4e-05	0.0135879
isogroup00449	N/A	109	0.000638095	41	0.000260501	0.408248	0	0
isogroup05233	Phosphoserine aminotransferase	82	0.000480035	31	0.000196964	0.410312	2e-06	0.000832913
isogroup00466	RNA-binding protein 39	201	0.00117667	77	0.000489234	0.415778	0	0
isogroup12537	N/A	80	0.000468326	31	0.000196964	0.42057	4e-06	0.00151775
isogroup00068	Neuroblast differentiation-associated protein AHNAK	652	0.00381686	255	0.00162019	0.424482	0	0
isogroup00178	Plexin-A1	74	0.000433202	29	0.000184257	0.425337	1e-05	0.0032836
isogroup03454	Formin-binding protein 4	56	0.000327829	22	0.000139781	0.426385	9.2e-05	0.0205151
isogroup04631	Myb-like protein X	91	0.000532721	36	0.000228733	0.429366	2e-06	0.000832913
isogroup01035	Chromodomain-helicase-DNA-binding protein 3	214	0.00125277	86	0.000546417	0.436166	0	0
isogroup00333	Probable serine/threonine-protein kinase kinX	62	0.000362953	25	0.000158842	0.437638	6.1e-05	0.0145237
isogroup01428	N/A	141	0.000825425	57	0.00036216	0.438756	0	0
isogroup04532	Filamin-A	610	0.00357099	248	0.00157571	0.441254	0	0
isogroup00038	Myosin light chain 3, skeletal muscle isoform	103	0.00060297	42	0.000266855	0.442567	1e-06	0.000441044
isogroup01085	Probable JmjC domain-containing histone demethylation protein 2C	71	0.00041564	29	0.000184257	0.443309	2.6e-05	0.00736398
isogroup02226	Zinc finger MYND domain-containing protein 11	158	0.000924945	66	0.000419343	0.453371	0	0
isogroup15011	40S ribosomal protein S12	79	0.000462472	33	0.000209672	0.453371	1.5e-05	0.00470563
isogroup01524	Polyadenylate-binding protein 2-A	71	0.00041564	30	0.000190611	0.458596	4.2e-05	0.0108423
isogroup05458	PCTP-like protein	256	0.00149865	109	0.000692552	0.462119	0	0
isogroup00309	N/A	223	0.00130546	95	0.0006036	0.462366	0	0
isogroup04647	Translocon-associated protein subunit alpha	63	0.000368807	27	0.000171549	0.465147	0.000117	0.0249718
isogroup01411	Coagulation factor X	130	0.000761031	56	0.000355806	0.467532	0	0
isogroup00150	Caspase-2	58	0.000339537	25	0.000158842	0.46782	0.00021	0.0395896
isogroup00134	Putative leucine-rich repeat-containing protein DDB_G0290503	67	0.000392223	29	0.000184257	0.469775	8.8e-05	0.019808
isogroup00191	Low-density lipoprotein receptor-related protein 4	76	0.00044491	33	0.000209672	0.471267	3.8e-05	0.00993846
isogroup04622	Protein fem-1 homolog C	78	0.000456618	34	0.000216025	0.473098	3.3e-05	0.00910914
isogroup04538	Zinc finger protein 574	89	0.000521013	39	0.000247794	0.4756	1.2e-05	0.00386597
isogroup05057	Transcription factor Sox-17-beta.3	205	0.00120009	90	0.000571832	0.476492	0	0
isogroup01426	N/A	61	0.000357099	27	0.000171549	0.480398	0.000211	0.0397155
isogroup02225	Serine/threonine-protein kinase D3	63	0.000368807	28	0.000177903	0.482375	0.000183	0.0357982
isogroup05481	Ras-related protein Rap-2c	77	0.000450764	35	0.000222379	0.493338	6.7e-05	0.0158262
isogroup02106	Hepatoma-derived growth factor-related protein 3	72	0.000421494	33	0.000209672	0.497449	0.000118	0.0251403
isogroup00181	Nuclear receptor coactivator 4	109	0.000638095	50	0.000317684	0.497864	5e-06	0.00183881
isogroup06151	Talin-1	424	0.00248213	196	0.00124532	0.501715	0	0

## Sheet: Up-regulated genes
Sequence ID	Gene Name (top BLAST hit)	Number of reads in active adults libarary	Relative abundance in active adults libarary	Number of reads in aestivating adults libarary	Relative abundance in aestivating adults libarary	Fold change	P-value (Audic and Claverie test)	FDR
isogroup05820	Tubulin alpha-1 chain	0	0	198	0.00125803	infinite	0	0
isogroup07833	Ovostatin	0	0	125	0.000794211	infinite	0	0
isogroup06803	Creatine kinase U-type, mitochondrial	0	0	72	0.000457465	infinite	0	0
isogroup09385	N/A	0	0	66	0.000419343	infinite	0	0
isogroup06383	Testis-specific serine/threonine-protein kinase 1	0	0	61	0.000387575	infinite	0	0
isogroup13478	N/A	0	0	40	0.000254147	infinite	0	0
isogroup04646	N/A	0	0	39	0.000247794	infinite	0	0
isogroup01756	63 kDa sperm flagellar membrane protein	0	0	37	0.000235086	infinite	0	0
isogroup05502	N/A	0	0	34	0.000216025	infinite	0	0
isogroup02904	N/A	0	0	26	0.000165196	infinite	0	0
isogroup18228	N/A	0	0	24	0.000152488	infinite	0	0
isogroup08061	Protein FAM154B	0	0	23	0.000146135	infinite	0	0
isogroup05845	Potassium/sodium hyperpolarization-activated cyclic nucleotide-gated channel 2	0	0	22	0.000139781	infinite	0	0
isogroup07344	N/A	0	0	22	0.000139781	infinite	0	0
isogroup15471	N/A	0	0	22	0.000139781	infinite	0	0
isogroup18322	N/A	0	0	22	0.000139781	infinite	0	0
isogroup06052	Coiled-coil domain-containing protein 105	0	0	21	0.000133427	infinite	0	0
isogroup00500	Stromal cell-derived factor 2	0	0	20	0.000127074	infinite	0	0
isogroup18496	Tubulin beta chain	0	0	20	0.000127074	infinite	0	0
isogroup05214	N/A	1	5.85e-06	453	0.00287822	491.66	0	0
isogroup00008	N/A	6	3.51e-05	749	0.00475891	135.487	0	0
isogroup00224	Tetratricopeptide repeat protein 29	6	3.51e-05	582	0.00369784	105.278	0	0
isogroup00875	N/A	3	1.76e-05	230	0.00146135	83.2096	0	0
isogroup04555	Speract receptor	2	1.17e-05	104	0.000660783	56.4378	0	0
isogroup00840	Histone deacetylase complex subunit SAP18	1	5.85e-06	49	0.000311331	53.1818	0	0
isogroup02464	Pleckstrin homology domain-containing family A member 8	2	1.17e-05	78	0.000495587	42.3284	0	0
isogroup05047	Sodium/potassium/calcium exchanger 3	1	5.85e-06	39	0.000247794	42.3284	0	0
isogroup05410	Tektin-3	1	5.85e-06	35	0.000222379	37.987	0	0
isogroup08196	N/A	9	5.27e-05	305	0.00193787	36.7811	0	0
isogroup07196	Actin-5C	2	1.17e-05	65	0.000412989	35.2736	0	0
isogroup01535	Alpha-crystallin B chain	3	1.76e-05	96	0.000609954	34.731	0	0
isogroup02978	N/A	1	5.85e-06	30	0.000190611	32.5603	0	0
isogroup08770	N/A	1	5.85e-06	30	0.000190611	32.5603	0	0
isogroup04408	MAM domain-containing protein 2	1	5.85e-06	25	0.000158842	27.1336	0	0
isogroup08164	Tubulin alpha chain	1	5.85e-06	21	0.000133427	22.7922	1e-06	0.000441044
isogroup00229	N/A	1	5.85e-06	21	0.000133427	22.7922	1e-06	0.000441044
isogroup02468	N/A	2	1.17e-05	41	0.000260501	22.2495	0	0
isogroup00330	Tubulin beta-2C chain	10	5.85e-05	200	0.00127074	21.7069	0	0
isogroup01720	39S ribosomal protein L15, mitochondrial	3	1.76e-05	60	0.000381221	21.7069	0	0
isogroup02238	Steroid 17-alpha-hydroxylase/17,20 lyase	1	5.85e-06	20	0.000127074	21.7069	2e-06	0.000832913
isogroup11376	Metalloproteinase inhibitor 4	1	5.85e-06	20	0.000127074	21.7069	2e-06	0.000832913
isogroup00992	N/A	5	2.93e-05	91	0.000578185	19.7532	0	0
isogroup01063	Tetratricopeptide repeat protein 25	2	1.17e-05	34	0.000216025	18.4508	0	0
isogroup07996	N/A	8	4.68e-05	133	0.00084504	18.0438	0	0
isogroup06122	Deleted in malignant brain tumors 1 protein	2	1.17e-05	33	0.000209672	17.9082	0	0
isogroup17487	Mothers against decapentaplegic homolog 3	2	1.17082e-05	33	0.000209672	17.9082	0	0
isogroup02306	N/A	15	8.78e-05	232	0.00147	16.7866	0	0
isogroup08595	Sushi repeat-containing protein SRPX	4	2.34e-05	54	0.000343	14.6521	0	0
isogroup00346	Heat shock protein beta-1	4	2.34e-05	50	0.000317684	13.5668	0	0
isogroup01413	Coatomer subunit gamma-2	3	1.76e-05	37	0.000235086	13.3859	0	0
isogroup00900	N/A	3	1.76e-05	37	0.000235086	13.3859	0	0
isogroup05129	Uncharacterized protein C11orf66	2	1.17e-05	22	0.000139781	11.9388	4e-06	0.00151775
isogroup17061	N/A	2	1.17e-05	22	0.000139781	11.9388	4e-06	0.00151775
isogroup01642	Superoxide dismutase [Cu-Zn]	2	1.17e-05	22	0.00014	11.9388	4e-06	0.00151775
isogroup15262	N/A	3	1.76e-05	32	0.000203318	11.577	0	0
isogroup06325	Neurotrypsin	5	2.93e-05	53	0.000336745	11.5046	0	0
isogroup06226	Multiple epidermal growth factor-like domains protein 11	2	1.17e-05	21	0.000133427	11.3961	7e-06	0.0024975
isogroup02130	Tektin-4	4	2.34e-05	40	0.000254147	10.8534	0	0
isogroup02726	Probable G-protein coupled receptor 112	3	1.76e-05	29	0.000184257	10.4916	0	0
isogroup05432	Cubilin	3	1.76e-05	28	0.000177903	10.1299	0	0
isogroup02116	Hephaestin	11	6.44e-05	101	0.000641722	9.96542	0	0
isogroup00760	Protein disulfide-isomerase A3	51	0.000299	448	0.00284645	9.53399	0	0
isogroup06818	N/A	3	1.76e-05	26	0.000165196	9.4063	1e-06	0.000441044
isogroup06959	Breakpoint cluster region protein	6	3.51e-05	48	0.000304977	8.68274	0	0
isogroup00645	Epithelial chloride channel protein	17	9.95e-05	135	0.000857747	8.6189	0	0
isogroup04988	AP-2 complex subunit alpha-2	6	3.51e-05	47	0.000298623	8.50185	0	0
isogroup04937	Angiopoietin-related protein 1	3	1.76e-05	23	0.000146135	8.32096	9e-06	0.0029964
isogroup01239	Myophilin	13	7.61e-05	96	0.000609954	8.01484	0	0
isogroup02676	Putative adenosylhomocysteinase 3	3	1.76e-05	22	0.000139781	7.95918	1.6e-05	0.00490351
isogroup02209	Phosphatidylserine decarboxylase proenzyme	4	2.34e-05	29	0.000184257	7.86873	1e-06	0.000441044
isogroup07884	NF-kappa-B inhibitor zeta	3	1.76e-05	21	0.000133427	7.5974	2.9e-05	0.00802354
isogroup06141	N/A	3	1.76e-05	21	0.000133427	7.5974	2.9e-05	0.00802354
isogroup05832	Putative phospholipase B-like 2	4	2.34e-05	27	0.000171549	7.32606	3e-06	0.00121138
isogroup07107	CD151 antigen	4	2.34e-05	27	0.000171549	7.32606	3e-06	0.00121138
isogroup18703	Interferon-induced very large GTPase 1	3	1.76e-05	20	0.000127074	7.23562	5.4e-05	0.0135879
isogroup02374	N/A	5	2.93e-05	33	0.000209672	7.16326	0	0
isogroup18277	N/A	156	0.000913	1016	0.00645534	7.06864	0	0
isogroup02206	Uncharacterized protein C2orf77	5	2.93e-05	31	0.000196964	6.72912	1e-06	0.000441044
isogroup00034	Heat shock 70 kDa protein IV	58	0.00034	358	0.00227462	6.69918	0	0
isogroup02388	Cathepsin L	6	3.51e-05	37	0.000235086	6.69295	0	0
isogroup02728	Fibropellin-1	6	3.51e-05	37	0.000235086	6.69295	0	0
isogroup06018	N/A	4	2.34e-05	24	0.000152488	6.51206	1.7e-05	0.00517021
isogroup04624	E3 ubiquitin-protein ligase UBR2	4	2.34e-05	22	0.000139781	5.96938	5.4e-05	0.0135879
isogroup04669	Early growth response protein 1-A	30	0.000176	163	0.00103565	5.89703	0	0
isogroup13292	N/A	10	5.85e-05	52	0.000330392	5.64378	0	0
isogroup01784	ATP synthase lipid-binding protein, mitochondrial	5	2.93e-05	26	0.000165196	5.64378	1.7e-05	0.00517021
isogroup03017	Ribonuclease kappa	6	3.51e-05	31	0.000196964	5.6076	3e-06	0.00121138
isogroup10097	Serine protease inhibitor dipetalogastin	6	3.51e-05	31	0.000196964	5.6076	3e-06	0.00121138
isogroup05999	Homeobox protein Nkx-2.1	8	4.68e-05	41	0.000260501	5.56238	0	0
isogroup04833	Complement C1q tumor necrosis factor-related protein 4	12	7.02e-05	60	0.000381221	5.42671	0	0
isogroup00503	cGMP-specific 3',5'-cyclic phosphodiesterase	4	2.34e-05	20	0.000127074	5.42671	0.000168	0.0336656
isogroup01469	Endothelin B receptor	14	8.2e-05	67	0.000425697	5.19414	0	0
isogroup14329	N/A	8	4.68e-05	38	0.00024144	5.15538	1e-06	0.000441044
isogroup10886	Glycine N-methyltransferase	6	3.51e-05	28	0.000177903	5.06493	1.6e-05	0.00490351
isogroup05731	N/A	6	3.51e-05	28	0.000177903	5.06493	1.6e-05	0.00490351
isogroup00073	Cornifelin homolog B	11	6.44e-05	51	0.000324038	5.03204	0	0
isogroup12896	Fibrinogen gamma chain	5	2.93e-05	23	0.000146135	4.99258	8.9e-05	0.0199579
isogroup04780	Receptor-type tyrosine-protein phosphatase kappa	7	4.1e-05	32	0.000203318	4.96157	5e-06	0.00183881
isogroup01552	Actin, cytoskeletal	43	0.000251725	196	0.00124532	4.94714	0	0
isogroup02713	N/A	5	2.93e-05	22	0.000139781	4.77551	0.000153	0.0314751
isogroup02302	ADP/ATP translocase 2	86	0.000503	373	0.00236992	4.70736	0	0
isogroup00257	Melanotransferrin	54	0.00031612	234	0.00148676	4.70315	0	0
isogroup01646	N/A	14	8.2e-05	59	0.000374867	4.57394	0	0
isogroup00364	Major yolk protein	1764	0.0103	7409	0.0470744	4.55856	0	0
isogroup07593	N/A	9	5.27e-05	36	0.000228733	4.34137	4e-06	0.00151775
isogroup02458	Tyrosine-protein kinase Yes	7	4.1e-05	28	0.000177903	4.34137	4.2e-05	0.0108423
isogroup10422	N/A	6	3.51e-05	24	0.000152488	4.34137	0.000134	0.0280984
isogroup04774	N/A	23	0.000135	90	0.000571832	4.24699	0	0
isogroup00378	Heat shock protein beta-1	6	3.51e-05	23	0.000146135	4.16048	0.000224	0.0413166
isogroup00242	Muscleblind-like protein 3	8	4.68e-05	30	0.000190611	4.07004	3.6e-05	0.00971293
isogroup04611	UPF0458 protein C7orf42 homolog	10	5.85e-05	37	0.000235086	4.01577	6e-06	0.00216005
isogroup06328	N/A	10	5.85e-05	37	0.000235086	4.01577	6e-06	0.00216005
isogroup04815	Alpha-2,8-sialyltransferase 8B	8	4.68e-05	29	0.000184257	3.93437	6e-05	0.0143715
isogroup10222	N/A	17	9.95e-05	61	0.000387575	3.89446	0	0
isogroup02325	Doublecortin domain-containing protein 2	7	4.1e-05	25	0.000158842	3.87622	0.00019	0.0369859
isogroup04596	MAM and LDL-receptor class A domain-containing protein C10orf112	11	6.44e-05	39	0.000247794	3.84803	5e-06	0.00183881
isogroup01531	N/A	174	0.00102	611	0.0038821	3.81117	0	0
isogroup02147	Calpain-B	22	0.000129	77	0.000489234	3.7987	0	0
isogroup04590	N/A	13	7.61e-05	45	0.000285916	3.75696	1e-06	0.000441044
isogroup06274	Probable glutathione S-transferase 5	9	5.27e-05	31	0.000196964	3.7384	5.1e-05	0.0129972
isogroup05352	N/A	21	0.000123	72	0.000457465	3.72117	0	0
isogroup02362	Glucose-6-phosphate 1-dehydrogenase	8	4.68e-05	27	0.000171549	3.66303	0.000159	0.032249
isogroup01351	Glycerophosphoinositol inositolphosphodiesterase GDPD2	9	5.27e-05	30	0.000190611	3.61781	8.2e-05	0.0184922
isogroup04813	Dolichyl-diphosphooligosaccharide--protein glycosyltransferase subunit 1	10	5.85e-05	33	0.000209672	3.58163	4.3e-05	0.0110527
isogroup01591	Putative transmembrane protein LOC401397	14	8.2e-05	46	0.000292269	3.56613	2e-06	0.000832913
isogroup15398	60S ribosomal protein L27	11	6.44e-05	36	0.000228733	3.55203	2.2e-05	0.00627567
isogroup11282	Scavenger receptor cysteine-rich type 1 protein M130	8	4.68e-05	26	0.000165	3.52736	0.000256	0.047001
isogroup02173	Signal peptide peptidase-like 3	8	4.68e-05	26	0.000165196	3.52736	0.000256	0.0470014
isogroup06985	N/A	13	7.61e-05	42	0.000266855	3.50649	6e-06	0.00216005
isogroup04776	Tubulin beta chain	51	0.000299	161	0.00102294	3.42628	0	0
isogroup01697	Transmembrane protein 59	9	5.27e-05	28	0.000177903	3.37662	0.00021	0.0395896
isogroup05609	Talin-1	9	5.27e-05	28	0.000177903	3.37662	0.00021	0.0395896
isogroup04757	Long-chain-fatty-acid--CoA ligase 4	10	5.85e-05	31	0.000196964	3.36456	0.000108	0.0232167
isogroup02168	Alpha-adducin	55	0.000321974	170	0.00108013	3.3547	0	0
isogroup08783	Probable histone-lysine N-methyltransferase NSD2	12	7.02e-05	37	0.000235086	3.34647	2.9e-05	0.00802354
isogroup00011	N/A	19	0.000111	58	0.000368514	3.31315	0	0
isogroup02122	Serine/threonine-protein kinase LMTK2	15	8.78e-05	45	0.000285916	3.25603	7e-06	0.0024975
isogroup02281	Bax inhibitor 1	11	6.44e-05	33	0.000209672	3.25603	8.9e-05	0.0199579
isogroup01688	Fibropellin-1	19	0.000111	56	0.000355806	3.1989	1e-06	0.000441044
isogroup02657	Glycogen debranching enzyme	15	8.78e-05	44	0.000279562	3.18367	1e-05	0.0032836
isogroup05437	Dihydropyrimidinase	15	8.78e-05	44	0.000279562	3.18367	1e-05	0.0032836
isogroup04902	78 kDa glucose-regulated protein	60	0.000351	172	0.00109283	3.11132	0	0
isogroup04755	N/A	22	0.00012879	63	0.000400282	3.10803	0	0
isogroup00335	Spectrin alpha chain, brain	13	7.61e-05	37	0.000235086	3.08905	5.9e-05	0.0141604
isogroup04614	Protein disulfide-isomerase 2	37	0.000216601	105	0.000667137	3.08003	0	0
isogroup05533	Titin	12	7.02e-05	34	0.000216025	3.07514	0.000112	0.0239474
isogroup01441	Dual oxidase maturation factor 1	20	0.000117082	56	0.000355806	3.03896	2e-06	0.000832913
isogroup02178	Excitatory amino acid transporter 3	15	8.78e-05	42	0.000266855	3.03896	2.5e-05	0.00709757
isogroup01065	Nuclear factor erythroid 2-related factor 2	22	0.00012879	60	0.000381221	2.96003	1e-06	0.000441044
isogroup05453	Cyclic AMP-dependent transcription factor ATF-4	36	0.000211	96	0.000609954	2.89425	0	0
isogroup06669	Calcium-activated chloride channel regulator 4	21	0.000123	56	0.000355806	2.89425	3e-06	0.00121138
isogroup05159	Cathepsin L1	12	7.03e-05	32	0.0002033	2.89425	0.000265	0.0484306
isogroup00076	Dynein light chain Tctex-type 1	12	7.02e-05	32	0.000203318	2.89425	0.000265	0.0484306
isogroup00157	Sequestosome-1	12	7.02e-05	32	0.000203318	2.89425	0.000265	0.0484306
isogroup06436	N/A	22	0.000129	58	0.000368514	2.86136	2e-06	0.000832913
isogroup01460	Sodium-independent sulfate anion transporter	26	0.000152206	68	0.000432051	2.83859	0	0
isogroup01508	Epididymal secretory protein E1	13	7.61e-05	34	0.000216025	2.83859	0.000212	0.039841
isogroup02115	Transcription factor AP-1	70	0.00041	183	0.00116272	2.8374	0	0
isogroup15625	N/A	17	9.95e-05	44	0.000279562	2.80912	3.8e-05	0.00993846
isogroup08811	Paxillin	14	8.2e-05	36	0.000228733	2.79088	0.000169	0.0336656
isogroup00445	Hepatic leukemia factor	16	9.37e-05	41	0.000260501	2.78119	7.2e-05	0.0165812
isogroup04689	Cofilin	62	0.000362953	157	0.000997528	2.74837	0	0
isogroup01048	[Pyruvate dehydrogenase [lipoamide]] kinase isozyme 2, mitochondrial	39	0.000228309	98	0.000622661	2.72727	0	0
isogroup02175	Syntenin-1	24	0.000140498	60	0.000381221	2.71336	4e-06	0.00151775
isogroup04701	Lysosomal-associated transmembrane protein 4A	21	0.000122936	52	0.000330392	2.68752	1.6e-05	0.00490351
isogroup06210	N/A	18	0.000105373	44	0.000279562	2.65306	6.8e-05	0.0158742
isogroup01410	Bifunctional 3'-phosphoadenosine 5'-phosphosulfate synthase	30	0.000175622	73	0.000463819	2.641	1e-06	0.000441044
isogroup05050	Fructose-bisphosphate aldolase	19	0.000111228	46	0.000292269	2.62767	5.4e-05	0.0135879
isogroup00249	Actin, non-muscle 6.2	307	0.0017972	743	0.00472079	2.62674	0	0
isogroup00067	Coactosin-like protein	22	0.000129	53	0.000336745	2.61469	1.9e-05	0.00556602
isogroup05545	NF-kappa-B inhibitor epsilon	21	0.000122936	50	0.000317684	2.58415	3.5e-05	0.00952917
isogroup17289	60S ribosomal protein L26	17	9.95e-05	40	0.000254147	2.55375	0.000187	0.0365209
isogroup06217	Guanine nucleotide-binding protein subunit beta-2-like 1	121	0.000708344	281	0.00178539	2.52051	0	0
isogroup00007	N/A	60	0.000351245	137	0.000870455	2.4782	0	0
isogroup01101	N/A	22	0.00012879	50	0.000317684	2.46669	5.9e-05	0.0141604
isogroup02119	Multiple epidermal growth factor-like domains protein 11	36	0.000210747	81	0.000514648	2.44202	1e-06	0.000441044
isogroup01437	CCAAT/enhancer-binding protein beta	24	0.000140498	54	0.000343099	2.44202	3.7e-05	0.00971945
isogroup04570	Major yolk protein	643	0.00376417	1410	0.00895869	2.37999	0	0
isogroup00648	Prostamide/prostaglandin F synthase	21	0.000122936	46	0.000292269	2.37742	0.000155	0.0317771
isogroup00095	Sialate O-acetylesterase	49	0.00028685	107	0.000679844	2.37003	0	0
isogroup01036	Myosin heavy chain, striated muscle	229	0.00134059	492	0.00312601	2.33183	0	0
isogroup00579	N/A	22	0.00012879	47	0.000298623	2.31869	0.000176	0.0347129
isogroup02572	BAG family molecular chaperone regulator 3	25	0.000146352	52	0.000330392	2.25751	0.000124	0.0261391
isogroup02117	Receptor-type tyrosine-protein phosphatase F	32	0.000187331	65	0.000412989	2.2046	3.5e-05	0.00952917
isogroup07941	N/A	35	0.000204893	71	0.000451112	2.2017	1.8e-05	0.00531213
isogroup06006	N/A	38	0.000222455	77	0.000489234	2.19925	9e-06	0.0029964
isogroup18110	60S acidic ribosomal protein P0	27	0.00015806	53	0.000336745	2.13049	0.000213	0.0399661
isogroup00803	SEC14 domain and spectrin repeat-containing protein 1	47	0.000275142	90	0.000571832	2.07832	6e-06	0.00216005
isogroup00762	Translation elongation factor 2	61	0.000357099	116	0.000737027	2.06393	1e-06	0.000441044
isogroup00913	Carboxypeptidase N subunit 2	59	0.000345391	112	0.000711613	2.06031	1e-06	0.000441044
isogroup00072	Polyubiquitin-C	84	0.000491743	158	0.00100388	2.04148	0	0
isogroup00057	Major yolk protein	439	0.00256994	820	0.00521002	2.02729	0	0
isogroup02187	RNA-binding motif, single-stranded-interacting protein 1	81	0.000474181	151	0.000959406	2.02329	0	0
